# Supplementary material for: Exploring the Safety of Pllans-II and Antitumoral Potential of Its Recombinant Isoform in Cervical Cancer Therapy
Source: MDPI journal article supplement (doi:10.3390/cells12242812), 2023-12-10
Supplement: s1 [file s1]

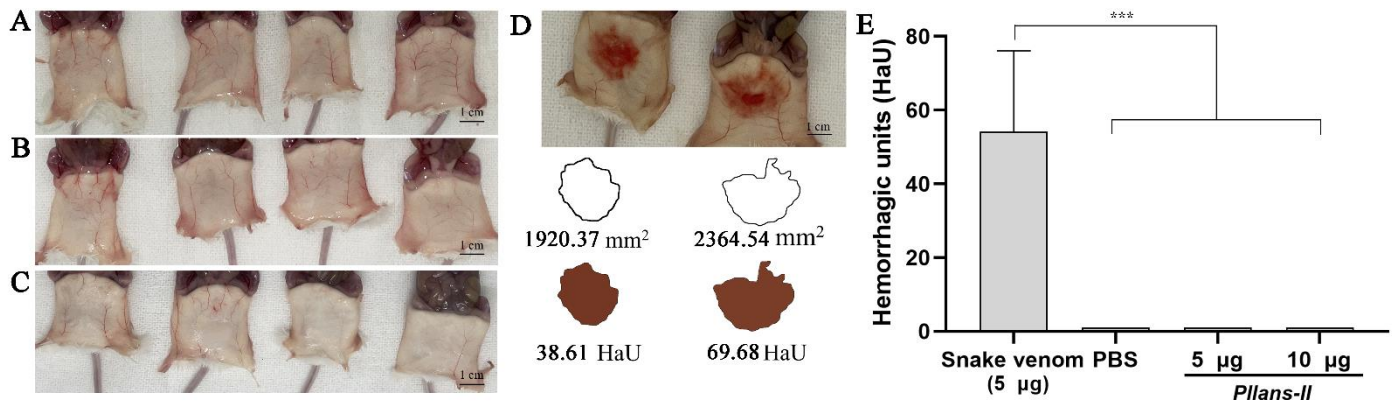

**Supplementary Figure S1.** Determination of local hemorrhagic activity after intradermal injection of two doses of *Pllans-II*. (A) An intradermal region without visible lesions after injection with 5 µg or (B) 10 µg of *Pllans-II*. (C) PBS as the negative control. (D) Hemorrhagic areas caused by injection of 5 µg of *P. lansbergii lansbergii* snake venom as a positive control (n = 2). (E) The hemorrhagic units (HaU) corresponding to tissue extravasation are specified in the bar graph. No statistical significance was found,  $p > 0.05$ . Statistically significant vs. control (Snake venom): \*\*\*  $p < 0.001$ .
